# Supplementary material
Source: PubMed Central journal article supplement (PMC2785269)
Supplement: 0907027106_0907027106SI.pdf [file 0907027106_0907027106SI.pdf]

# Supporting Information

Lippman and Broach 10.1073/pnas.0907027106

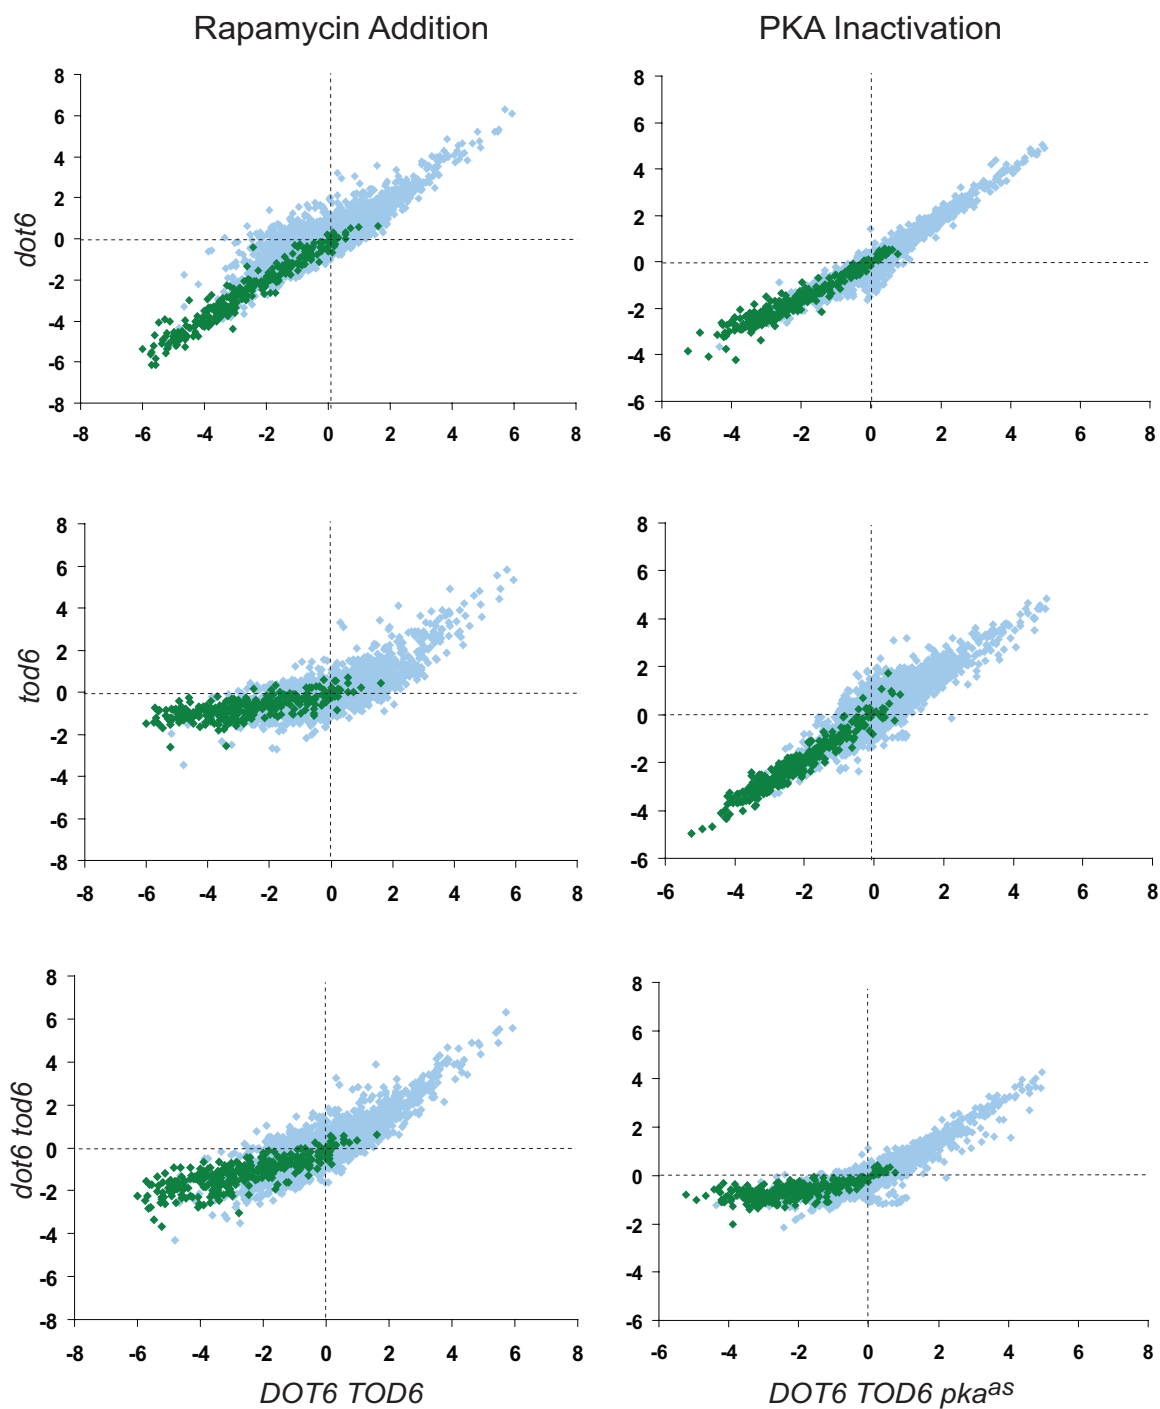

Fig. S1. Dot6 and Tod6 are required for repression of Ribi genes at early times after inactivation of TORC1 or PKA. Data are presented as in Fig. 2 for samples taken 20 min after treatment with rapamycin or 1NM-PP1.



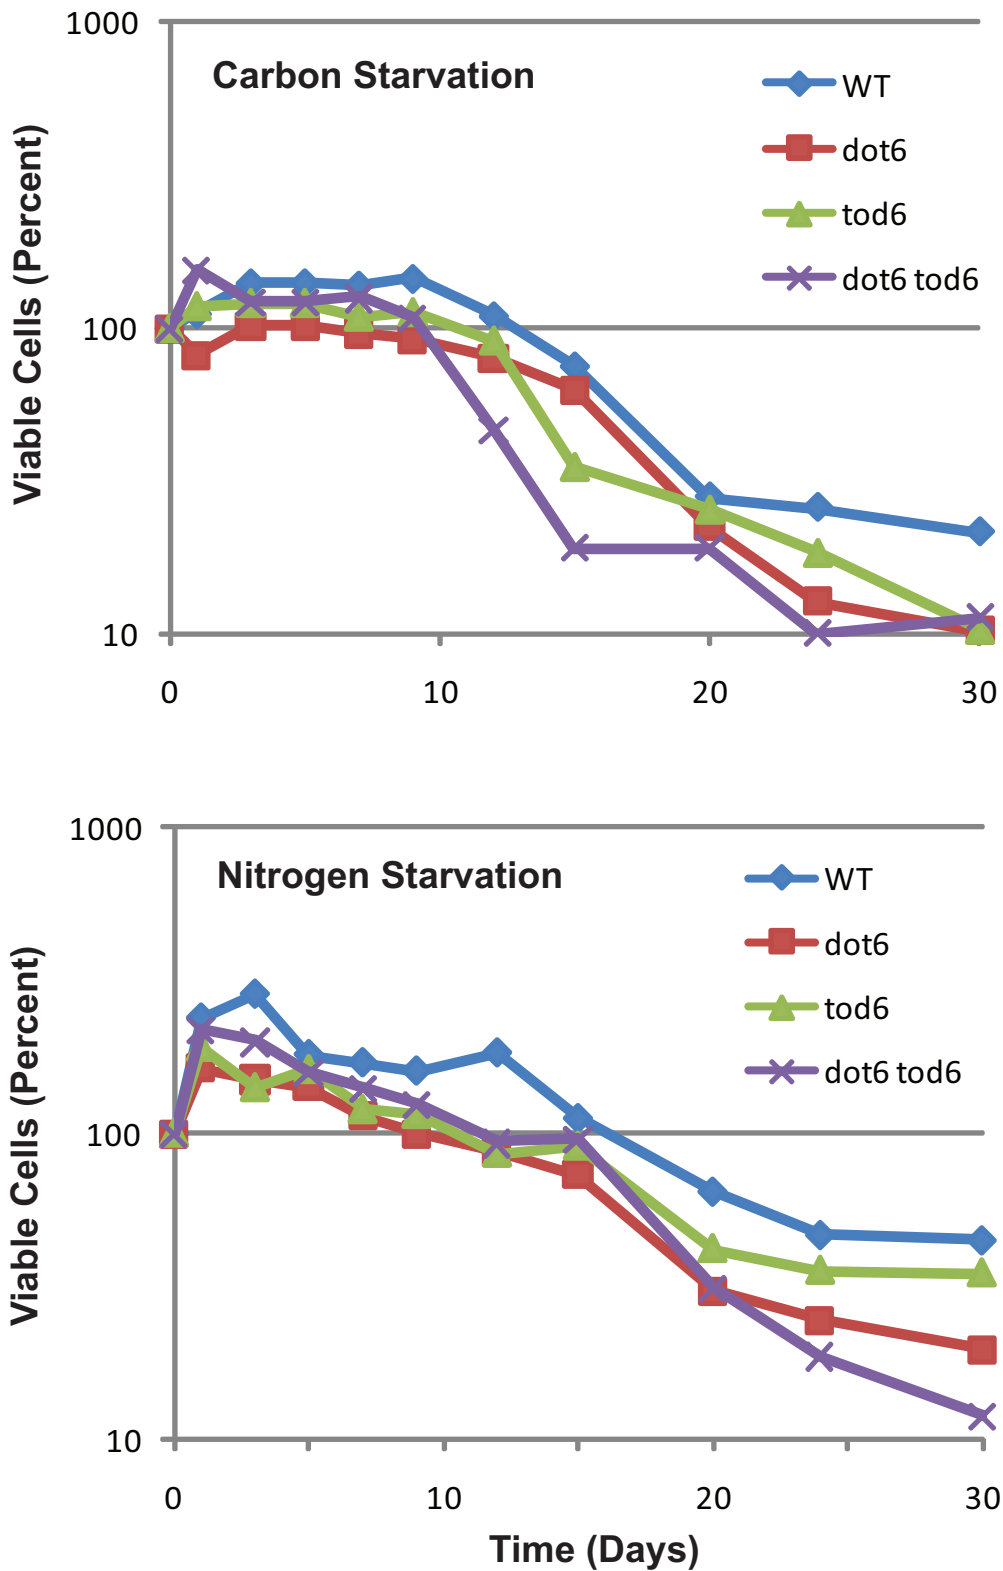

**Fig. S3.** Dot6 and Tod6 are required for sustained viability after nutrient starvation. WT and deletion prototroph strains were grown overnight in SC medium plus 2% glucose and 0.5% ammonium sulfate, diluted into the same medium but limiting for glucose (0.8%) or ammonium sulfate (0.03%) and grown overnight. Strains were then diluted 1:200 into media entirely lacking either glucose or nitrogen sources and incubated at 30 °C. Samples were taken at the times indicated, and viable cell count was determined by plating appropriate dilutions on YPD agar plates. Data are plotted as a percent of the initial viable cell count for each strain.





**Table S2. Dot6 and Tod6 phosphorylation is affected by glucose upshift**

| Protein | Site*                        | Change in phosphorylation <sup>†</sup> |
|---------|------------------------------|----------------------------------------|
| Dot6    | 476-LNALSSDADMLSPHSPQK       | 1.0                                    |
|         | 245-SNSHSFTNSLNQDPIVR        | 1.0                                    |
|         | 310-RRGSLANWSR               | 1.8–2.0                                |
|         | 310-RRGSLANWSR               | 1.3                                    |
|         | 521-DVSPDPIFSPDPADDSSNTSDAGS | 0.8                                    |
|         | 507-SGSTTDDDKGSD             | 0.8                                    |
| Tod6    | 330-RRASLVVSPYMSP            | 3.0                                    |
|         | 330-RRASLVVSPYMSP            | >1.0                                   |
|         | 330-RRASLVVSPYMSP            | 0.8                                    |
|         | 224-SFSHSITTNPV              | 1.4–1.8                                |

\*Phosphopeptide with phosphorylated S/T residue highlighted in bold. Starting residue of each peptide is indicated, and putative PKA sites are underlined

<sup>†</sup>Change in phosphopeptide levels 5 min after glucose addition to 2% to a culture of strain Y3615 (*arg4::kan lys1::kan car1::HIS3*) grown in SC plus 2% glycerol supplemented with <sup>12</sup>C-arginine and <sup>12</sup>C-lysine relative to that of the same strain grown in SC plus 2% glycerol supplement with <sup>13</sup>C-arginine and <sup>13</sup>C-lysine. Ratios were determined by total phosphoproteome measurements after trypsin digestion, SCX/IMAC enrichment, and MS/MS analysis of the mixed extracts as described previously [Gruhler A, et al. (2005) *Mol Cell Proteomics* 4:310–327; Villen J, Gygi SP (2008) *Nat Protoc* 3:1630–1638]. Data were provided by N. Petrenko, W. Kim, S. Gygi, and J.R.B.

**Table S3. Strains used in this study**

| Strain | Genotype                                                                                                                  | Source     |
|--------|---------------------------------------------------------------------------------------------------------------------------|------------|
| Y2092  | <i>ade2-1 can1-100 his3-11,15 leu2-3,112 trp1-1 ura3-1</i>                                                                | (1)        |
| Y3705  | <i>dot6Δ ::KanMX ade2-1 can1-100 his3-11,15 leu2-3,112 trp1-1 ura3-1</i>                                                  | This study |
| Y3706  | <i>tod6Δ ::HIS3 ade2-1 can1-100 his3-11,15 leu2-3,112 trp1-1 ura3-1</i>                                                   | This study |
| Y3707  | <i>tod6Δ ::HIS3 dot6Δ::KanMX ade2-1 can1-100 his3-11,15 leu2-3,112 trp1-1 ura3-1</i>                                      | This study |
| Y3561  | <i>tpk1(M164G) tpk2(M147G) tpk3(M165G) ade2-1 can1-100 his3-11,15 leu2-3,112 trp1-1 ura3-1</i>                            | (2)        |
| Y3708  | <i>dot6Δ ::KanMX tpk1(M164G) tpk2(M147G) tpk3(M165G) ade2-1 can1-100 his3-11,15 leu2-3,112 trp1-1 ura3-1</i>              | This study |
| Y3709  | <i>tod6Δ ::TRP1 tpk1(M164G) tpk2(M147G) tpk3(M165G) ade2-1 can1-100 his3-11,15 leu2-3,112 trp1-1 ura3-1</i>               | This study |
| Y3710  | <i>tod6Δ ::TRP1 dot6Δ ::KanMX tpk1(M164G) tpk2(M147G) tpk3(M165G) ade2-1 can1-100 his3-11,15 leu2-3,112 trp1-1 ura3-1</i> | This study |
| Y3507  | <i>sch9(T492G) gal1::HIS3 ade2-1 can1-100 his3-11,15 leu2-3,112 trp1-1 ura3-1</i>                                         | (3)        |
| Y3711  | <i>dot6Δ ::KanMX sch9(T492G) gal1::HIS3 ade2-1 can1-100 his3-11,15 leu2-3,112 trp1-1 ura3-1</i>                           | This study |
| Y3712  | <i>tod6Δ ::TRP1 sch9(T492G) gal1::HIS3 ade2-1 can1-100 his3-11,15 leu2-3,112 trp1-1 ura3-1</i>                            | This study |
| Y3713  | <i>tod6Δ ::TRP1 dot6Δ ::KanMX sch9(T492G) gal1::HIS3 ade2-1 can1-100 his3-11,15 leu2-3,112 trp1-1 ura3-1</i>              | This study |
| Y3628  | Prototroph                                                                                                                | (4)        |
| Y3714  | <i>dot6Δ ::KanMX</i>                                                                                                      | This study |
| Y3715  | <i>tod6Δ ::TRP1 trp1-1</i>                                                                                                | This study |
| Y3716  | <i>dot6Δ ::KanMX tod6Δ ::TRP1 trp1-1</i>                                                                                  | This study |

- Lee TI, et al. (2002) Transcriptional regulatory networks in *Saccharomyces cerevisiae*. *Science* 298:799–804.
- Zaman S, Lippman SI, Schnepfer L, Slonim N, Broach JR (2009) Glucose regulates transcription in yeast through a network of signaling pathways. *Mol Syst Biol* 5:245.
- Regenberg B, et al. (2006) Growth-rate regulated genes have profound impact on interpretation of transcriptome profiling in *Saccharomyces cerevisiae*. *Genome Biol* 7:R107.
- Prototroph derived from W303, kindly provided by Fred Cross.
